# Supplementary material for: Identification and Comparison of Constituents of Aurantii Fructus and Aurantii Fructus Immaturus by UFLC-DAD-Triple TOF-MS/MS
Source: PubMed Central journal article supplement (PMC6017871; doi:10.3390/molecules23040803), 2018-03-30
Supplement: molecules-23-00803-s001.pdf [file molecules-23-00803-s001.pdf]

**Table S1.** Qualitative comparison of constituents in AF and AFI.

|                                                                               |                                        | No.           | <i>t<sub>R</sub></i> /<br>min | Molecular<br>formula                            | Identification                                  |                               |
|-------------------------------------------------------------------------------|----------------------------------------|---------------|-------------------------------|-------------------------------------------------|-------------------------------------------------|-------------------------------|
| Compounds<br>in AF and AFI                                                    | Organic acids                          | 1             | 2.54                          | C <sub>7</sub> H <sub>12</sub> O <sub>6</sub>   | Quinic acid                                     |                               |
|                                                                               | Alkaloids                              | 2             | 13.59                         | C <sub>9</sub> H <sub>13</sub> NO <sub>2</sub>  | Synephrine                                      |                               |
|                                                                               | Flavonoids                             | 3             | 7.49                          | C <sub>27</sub> H <sub>30</sub> O <sub>16</sub> | Rutin                                           |                               |
|                                                                               |                                        | 6             | 7.04                          | C <sub>27</sub> H <sub>32</sub> O <sub>15</sub> | Eriocitrin                                      |                               |
|                                                                               |                                        | 9             | 8.08                          | C <sub>27</sub> H <sub>32</sub> O <sub>14</sub> | Narirutin                                       |                               |
|                                                                               |                                        | 10            | 8.29                          | C <sub>27</sub> H <sub>30</sub> O <sub>14</sub> | Rhoifolin                                       |                               |
|                                                                               |                                        | 12            | 8.44                          | C <sub>28</sub> H <sub>32</sub> O <sub>15</sub> | Diosmin                                         |                               |
|                                                                               |                                        | 13            | 8.50                          | C <sub>28</sub> H <sub>34</sub> O <sub>15</sub> | Hesperidin                                      |                               |
|                                                                               |                                        | 14            | 8.58                          | C <sub>28</sub> H <sub>32</sub> O <sub>15</sub> | Neodiosmin                                      |                               |
|                                                                               |                                        | 17            | 10.72                         | C <sub>28</sub> H <sub>34</sub> O <sub>14</sub> | Poncirin                                        |                               |
|                                                                               |                                        | 18            | 12.90                         | C <sub>15</sub> H <sub>12</sub> O <sub>5</sub>  | Naringenin                                      |                               |
|                                                                               |                                        | 19            | 13.56                         | C <sub>16</sub> H <sub>14</sub> O <sub>6</sub>  | Hesperetin                                      |                               |
|                                                                               |                                        | 24            | 16.14                         | C <sub>19</sub> H <sub>18</sub> O <sub>6</sub>  | 5,6,7,4'-Tetra<br>methoxyflavone                |                               |
|                                                                               |                                        | 25            | 14.69                         | C <sub>21</sub> H <sub>22</sub> O <sub>8</sub>  | Nobiletin                                       |                               |
|                                                                               |                                        | 26            | 17.97                         | C <sub>19</sub> H <sub>18</sub> O <sub>6</sub>  | 7,8,3',4'-Tetra<br>methoxyflavone               |                               |
|                                                                               |                                        | 27            | 18.70                         | C <sub>22</sub> H <sub>24</sub> O <sub>9</sub>  | 3-Methoxynobiletin                              |                               |
|                                                                               |                                        | 28            | 19.48                         | C <sub>20</sub> H <sub>20</sub> O <sub>7</sub>  | Tangeretin                                      |                               |
|                                                                               |                                        | 29            | 14.93                         | C <sub>20</sub> H <sub>20</sub> O <sub>8</sub>  | 5-O-Demethyl nobiletin                          |                               |
|                                                                               |                                        | Triterpenoids | 38                            | 16.37                                           | C <sub>26</sub> H <sub>30</sub> O <sub>8</sub>  | Limonin                       |
|                                                                               | Compounds present<br>in AF exclusively | Flavonoids    | 5                             | 7.50                                            | C <sub>27</sub> H <sub>30</sub> O <sub>15</sub> | Vicenin-2                     |
|                                                                               |                                        |               | 7                             | 7.58                                            | C <sub>27</sub> H <sub>32</sub> O <sub>15</sub> | Neoeriocitrin                 |
|                                                                               |                                        |               | 16                            | 11.08                                           | C <sub>15</sub> H <sub>12</sub> O <sub>6</sub>  | Eriodictyol                   |
|                                                                               |                                        |               | 20                            | 10.54                                           | C <sub>18</sub> H <sub>16</sub> O <sub>7</sub>  | Eupatilin                     |
|                                                                               |                                        |               | 21                            | 10.70                                           | C <sub>19</sub> H <sub>18</sub> O <sub>8</sub>  | Vitexicarpin                  |
|                                                                               |                                        | Coumarins     | 30                            | 10.08                                           | C <sub>15</sub> H <sub>16</sub> O <sub>4</sub>  | Meranzin hydrate              |
|                                                                               |                                        |               | 31                            | 11.13                                           | C <sub>14</sub> H <sub>14</sub> O <sub>4</sub>  | Marmesin                      |
|                                                                               |                                        |               | 32                            | 11.26                                           | C <sub>11</sub> H <sub>6</sub> O <sub>4</sub>   | Xanthotoxol                   |
|                                                                               |                                        |               | 33                            | 13.07                                           | C <sub>11</sub> H <sub>6</sub> O <sub>4</sub>   | Isomer of xanthotoxol         |
|                                                                               |                                        |               | 34                            | 13.19                                           | C <sub>15</sub> H <sub>16</sub> O <sub>4</sub>  | Isomer of<br>meranzin hydrate |
| 35                                                                            |                                        |               | 15.75                         | C <sub>15</sub> H <sub>16</sub> O <sub>3</sub>  | Osthole                                         |                               |
| 36                                                                            |                                        |               | 28.84                         | C <sub>9</sub> H <sub>6</sub> O <sub>3</sub>    | Umbelliferone                                   |                               |
| Triterpenoids                                                                 |                                        |               | 40                            | 17.78                                           | C <sub>28</sub> H <sub>34</sub> O <sub>9</sub>  | Nomilin                       |
| Compounds present<br>in AFI exclusively                                       | Flavonoids                             | 4             | 7.73                          | C <sub>27</sub> H <sub>30</sub> O <sub>15</sub> | Nicotiflorin                                    |                               |
|                                                                               |                                        | 8             | 8.18                          | C <sub>28</sub> H <sub>32</sub> O <sub>16</sub> | Narcissoside                                    |                               |
|                                                                               |                                        | 22            | 14.71                         | C <sub>20</sub> H <sub>20</sub> O <sub>7</sub>  | Isosinensetin                                   |                               |
|                                                                               |                                        | 23            | 16.10                         | C <sub>20</sub> H <sub>20</sub> O <sub>7</sub>  | Sinensetin                                      |                               |
|                                                                               | Triterpenoids                          | 37            | 14.20                         | C <sub>36</sub> H <sub>58</sub> O <sub>10</sub> | Pedunculoside                                   |                               |
| Compounds in AF and AFI<br>( <i>Citrus aurantium</i> ' L and its<br>cultivar) | Flavonoids                             | 11            | 8.30                          | C <sub>27</sub> H <sub>32</sub> O <sub>14</sub> | Naringin                                        |                               |
|                                                                               |                                        | 15            | 8.72                          | C <sub>28</sub> H <sub>34</sub> O <sub>15</sub> | Neohesperidin                                   |                               |
|                                                                               | Triterpenoids                          | 39            | 16.20                         | C <sub>26</sub> H <sub>30</sub> O <sub>7</sub>  | Obacunone                                       |                               |

**Table S2.** Qualitative information of constituents in AF and AFI.

| No. | [M+H] <sup>+</sup> /ppm<br>(Error) | [M-H] <sup>-</sup> /ppm<br>(Error) | Main fragment ions ( <i>m/z</i> )                                      |                                                  | Identification                |
|-----|------------------------------------|------------------------------------|------------------------------------------------------------------------|--------------------------------------------------|-------------------------------|
|     |                                    |                                    | Positive ion mode                                                      | Negative ion mode                                |                               |
| 1   |                                    | 191.0563 (-0.8)                    |                                                                        | 127.0403, 109.0298, 93.0359                      | Quinic acid                   |
| 2   | 168.1020 (-1.9)                    |                                    | 150.0915, 135.0682, 119.0498, 107.0509, 91.0556,<br>77.0407, 65.0420   |                                                  | Synephrine                    |
| 3   | 611.1581 (6.5)                     | 609.1891 (0.9)                     | 303.0471                                                               | 301.0742                                         | Rutin                         |
| 4   | 595.1637 (-0.8)                    | 593.1517 (0.8)                     | 287.0527                                                               | 285.0412                                         | Nicotiflorin                  |
| 5   | 595.1658 (0.1)                     | 593.1517 (0.8)                     | 577.1536, 457.1071, 295.0563                                           | 473.1096, 383.0778, 353.0679                     | Vicenin-2                     |
| 6   |                                    | 595.1666 (-0.4)                    |                                                                        | 287.0555, 151.0045, 135.0446                     | Eriocitrin                    |
| 7   |                                    | 595.1663 (-0.9)                    |                                                                        | 459.1155, 287.0570, 151.0041,135                 | Neoeriocitrin                 |
| 8   |                                    | 623.1619 (0.2)                     |                                                                        | 315.0514, 300.0270                               | Narcissoside                  |
| 9   | 581.1863 (-1.0)                    | 579.1716 (-0.7)                    | 273.0771, 153.0155                                                     | 459.1139, 271.0603, 151.0037                     | Narirutin                     |
| 10  | 579.1688 (-1.2)                    | 577.1592 (0.5)                     | 271.0583                                                               | 269.0457                                         | Rhoifolin                     |
| 11  | 581.1845 (-1.0)                    | 579.1747 (0.4)                     | 273.0710, 153.0127                                                     | 459.1180, 271.0622, 151.0041                     | Naringin                      |
| 12  | 609.1790 (-3.9)                    | 607.1671 (0.4)                     | 301.0686, 286.0460                                                     | 299.0573, 284.0349                               | Diosmin                       |
| 13  | 611.1946 (-0.8)                    | 609.1834 (0.8)                     | 303.0864                                                               | 301.0723, 286.0476                               | Hesperidin                    |
| 14  | 609.1792 (-3.6)                    | 607.1671 (0.4)                     | 301.0686, 286.0452                                                     | 299.0560, 284.0326                               | Neodiosmin                    |
| 15  | 611.1952 (-0.8)                    | 609.1874 (0.8)                     | 303.0867                                                               | 301.0727, 286.0495                               | Neohesperidin                 |
| 16  |                                    | 287.0563 (0.7)                     |                                                                        | 151.0034, 135.0442                               | Eriodictyol                   |
| 17  | 595.2002 (-0.6)                    | 593.1922 (-0.7)                    | 287.0899                                                               | 473.1457, 387.1073, 327.0864,285.0768, 270.0532  | Poncirin                      |
| 18  | 273.0758 (0.1)                     | 271.0630 (1.0)                     | 153.0191, 147.0463, 119.0513, 91.0551                                  | 151.0051, 119.0498                               | Naringenin                    |
| 19  | 303.0865 (0.5)                     | 301.0723 (1.8)                     | 177.0514, 153.0172                                                     | 286.0442, 164.0109, 151.0035,136.0155            | Hesperetin                    |
| 20  |                                    | 343.0827 (1)                       |                                                                        | 328.0572, 313.0346, 298.0118, 270.0152           | Eupatilin                     |
| 21  | 375.1073 (-0.4)                    | 373.0932 (0.8)                     | 345.0559, 317.0626, 299.0523                                           | 358.0693, 343.0453, 328.0264, 313.0009, 257.0137 | Vitexicarpin                  |
| 22  | 373.1285 (0.8)                     |                                    | 358.1067, 343.0833, 315.0873, 181.0173,153.0174                        |                                                  | Isosinensetin                 |
| 23  | 373.1282 (0)                       |                                    | 358.1045, 343.0823, 329.1067, 312.1003, 153.0198                       |                                                  | Sinensetin                    |
| 24  | 343.1174 (-0.7)                    |                                    | 328.0948, 313.0695, 285.0711, 181.0135,153.0188                        |                                                  | 5,6,7,4'-Tetramethoxyflavone  |
| 25  | 403.1388 (0.1)                     |                                    | 388.1132, 373.0872, 358.0646, 355.0780, 330.0712,<br>327.0837,301.0678 |                                                  | Nobiletin                     |
| 26  | 343.1174 (-0.8)                    |                                    | 327.0826, 313.0689, 299.0908, 282.0860, 181.0110,<br>153.0185          |                                                  | 7,8,3',4'-Tetramethoxyflavone |
| 27  | 433.1496 (0.7)                     |                                    | 418.1235, 403.0985, 385.0897                                           |                                                  | 3-Methoxynobiletin            |
| 28  | 373.1284 (-0.7)                    |                                    | 358.1065, 343.0827, 328.0560, 325.0731, 300.0646,                      |                                                  | Tangeretin                    |

|    |                 |                 |                                                  |                              |                            |
|----|-----------------|-----------------|--------------------------------------------------|------------------------------|----------------------------|
| 29 | 389.1232 (-0.2) |                 | 297.0788, 271.0647, 211.0260, 183.0299           |                              | 5-O-Demethyl nobiletin     |
| 30 | 261.1121 (-0.1) |                 | 374.1003, 359.0738, 341.0637                     |                              | Meranzin hydrate           |
| 31 | 247.0964 (-0.5) |                 | 243.1004, 189.0543, 159.0453, 131.0499, 103.0547 |                              | Marmesin                   |
| 32 | 203.0334 (-2.6) | 201.0193 (5.4)  | 229.0831, 175.0378, 147.0448                     |                              | Xanthotoxol                |
| 33 | 203.0318 (-2.6) | 201.0201 (4.0)  | 147.0432, 91.0555                                | 173.0237, 145.0292, 117.0351 | Isomer of Xanthotoxol      |
| 34 | 261.1121 (-0.3) |                 | 147.0435, 91.0553                                | 173.0231, 145.0289, 117.0333 | Isomer of meranzin hydrate |
| 35 | 245.1174 (0.6)  |                 | 243.1029, 189.0551, 159.0447, 131.0520, 103.0587 |                              | Osthole                    |
| 36 | 163.0391 (0.8)  |                 | 189.0538, 131.0503, 103.0573, 77.0457            |                              | Umbelliferone              |
| 37 | 649.4019 (0.9)  |                 | 119.0541, 107.0536, 91.0607, 77.0451             |                              | Pedunculoside              |
| 38 | 471.2011 (-0.5) | 469.1863 (-1.0) |                                                  | 695.4019, 487.3434           | Limonin                    |
| 39 | 455.2068 (0.8)  | 453.1918 (-0.3) | 425.1964, 367.1906, 339.1957, 161.0600           | 229. 1241                    | Obacunone                  |
| 40 | 515.2273 (-0.4) |                 | 409.2301, 161.0599                               | 435.1800, 391.1908           | Nomilin                    |

---

**Table S3.** Contents of naringin, hesperidin, neohesperidin, and synephrine in AF and AFI on the dried basis (n = 2, RSD < 2%).

| No. | Province | Naringin (%) | Hesperidin (%) | Neohesperidin (%) | Synephrine (%) |                                                     | No.      | Province | Naringin (%) | Hesperidin (%) | Neohesperidin (%) | Synephrine (%) |
|-----|----------|--------------|----------------|-------------------|----------------|-----------------------------------------------------|----------|----------|--------------|----------------|-------------------|----------------|
| Q01 | Jiangxi  | 4.27         | 0.28           | 3.39              | 0.008          | AFI ( <i>Citrus aurantium</i> ' L and its cultivar) | S04      | Jiangxi  | 9.59         | 0.73           | 15.48             | 0.49           |
| Q02 | Jiangxi  | 5.90         | 0.68           | 4.97              | 0.039          |                                                     | S06      | Jiangxi  | 9.52         | 0.36           | 7.81              | —              |
| Q03 | Jiangxi  | 5.99         | 0.55           | 5.20              | 0.019          |                                                     | S07      | Jiangxi  | 5.46         | 0.88           | 22.98             | 1.18           |
| Q04 | Jiangxi  | 4.46         | 0.29           | 3.34              | 0.020          |                                                     | S08      | Jiangxi  | 7.14         | 0.58           | 15.76             | 0.63           |
| Q05 | Jiangxi  | 4.90         | 0.62           | 3.74              | 0.030          |                                                     | S09      | Jiangxi  | 11.41        | 0.54           | 11.52             | 0.44           |
| Q06 | Jiangxi  | 4.93         | 0.31           | 3.83              | 0.007          |                                                     | S10      | Jiangxi  | 11.81        | 0.42           | 13.98             | 0.55           |
| Q07 | Jiangxi  | 4.77         | 0.34           | 3.90              | 0.012          |                                                     | S12      | Hunan    | 13.52        | 0.51           | 13.44             | 0.56           |
| Q08 | Jiangxi  | 5.25         | 0.38           | 4.17              | 0.024          |                                                     | S16      | Sichuan  | 8.60         | 0.39           | 10.52             | —              |
| Q09 | Jiangxi  | 6.54         | 0.46           | 5.30              | 0.057          |                                                     | S20      | Sichuan  | 10.52        | 0.22           | 10.30             | 0.60           |
| Q10 | Jiangxi  | 5.55         | 0.39           | 4.49              | 0.046          |                                                     | S21      | Zhejiang | 10.46        | 0.19           | 12.53             | —              |
| Q11 | Hunan    | 5.36         | 0.29           | 2.97              | 0.224          | S22                                                 | Zhejiang | 10.86    | 0.44         | 12.96          | —                 |                |
| Q12 | Hunan    | 6.21         | 0.58           | 5.03              | 0.018          | S23                                                 | Zhejiang | 10.44    | 0.44         | 11.70          | —                 |                |
| Q13 | Hunan    | 5.15         | 0.31           | 2.76              | 0.335          | AFI ( <i>Citrus sinensis</i> (L.) Osbeck)           | S01      | Jiangxi  | —            | 0.94           | —                 | 0.32           |
| Q14 | Hunan    | 5.82         | 0.43           | 0.21              | 0.031          |                                                     | S02      | Jiangxi  | —            | 0.81           | —                 | 0.29           |
| Q15 | Sichuan  | 5.06         | 0.33           | 3.61              | 0.013          |                                                     | S03      | Jiangxi  | —            | 0.46           | —                 | 0.86           |
| Q16 | Sichuan  | 5.06         | 0.31           | 3.77              | 0.015          |                                                     | S05      | Jiangxi  | —            | 0.96           | —                 | 0.22           |
| Q17 | Sichuan  | 4.06         | 0.21           | 3.40              | 0.099          |                                                     | S11      | Hunan    | —            | 0.97           | —                 | 0.52           |
| Q18 | Sichuan  | 5.10         | 0.33           | 3.63              | 0.012          |                                                     | S13      | Hunan    | —            | 0.62           | —                 | 0.60           |
| Q19 | Sichuan  | 5.36         | 0.18           | 4.78              | 0.169          |                                                     | S14      | Hunan    | —            | 0.92           | —                 | 0.46           |
| Q20 | Zhejiang | 4.18         | 0.35           | 3.35              | 0.012          |                                                     | S15      | Hunan    | —            | 0.73           | —                 | 0.91           |
| Q21 | Zhejiang | 4.52         | 0.37           | 3.27              | 0.012          |                                                     | S17      | Sichuan  | —            | 0.70           | —                 | 0.21           |
| Q22 | Zhejiang | 4.73         | 0.34           | 3.44              | 0.013          |                                                     | S18      | Sichuan  | —            | 0.85           | —                 | 0.47           |
| Q23 | Zhejiang | 4.99         | 0.14           | 2.91              | 0.139          |                                                     | S19      | Sichuan  | —            | 0.84           | —                 | 1.33           |
| Q24 | Zhejiang | 4.24         | 0.14           | 2.56              | 0.154          |                                                     |          |          |              |                |                   |                |

Note: "—": The constituent was not detected.
